# Supplementary material
Source: publisher figshare collection journal article supplement (https://gsajournals.figshare.com/articles/dataset/_/13370144)
Supplement: Supplementary file 4 [file 1]

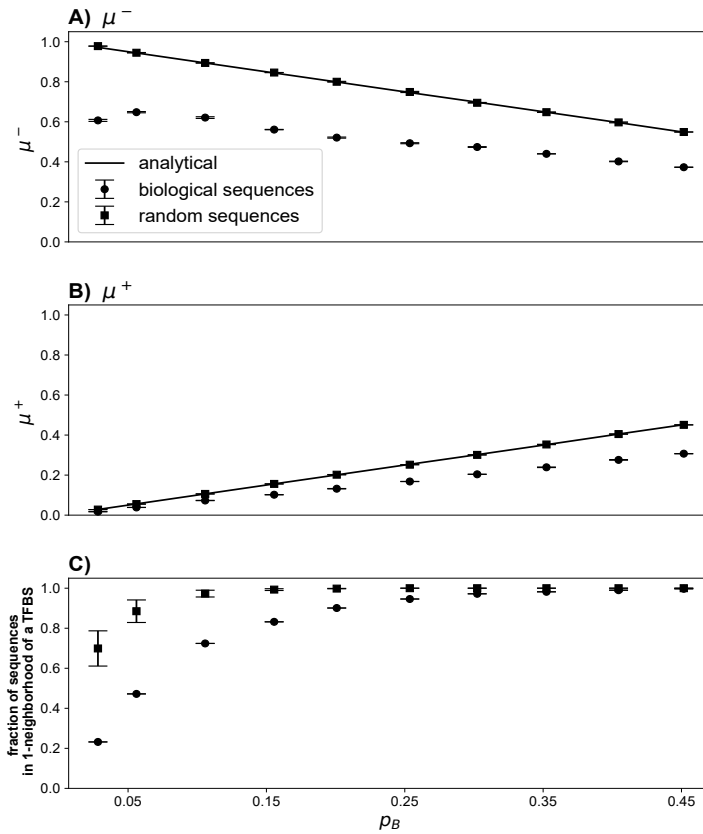

**Figure S2: Biological TF binding sites and random sequences differ in  $\mu^+$  and  $\mu^-$ .** In each panel, the horizontal axis shows the fraction  $p_B$  of sequence space  $S$  ( $L = 8$ ) filled with mouse TF binding sites ('biological sequences') or with the same proportion  $p_B$  of randomly and uniformly distributed eight-mers in which all nucleotides are equiprobable ('random sequences'). I refer to such a set of random sequences as  $r_B$ . **A)** the vertical axis shows the likelihood  $\mu^-$  that a single random nucleotide change in a TF binding site destroys this binding site (circles), or that it transforms a random sequence in the set  $r_B$  into a sequence outside this set (squares). The analytical approximation is given by  $1 - p_B$  (File S2). **B)** the vertical axis shows the likelihood  $\mu^+$  that a single random nucleotide change in a sequence from sequence space creates a TF binding site (circles), or that it transforms a sequence outside the set  $r_B$  into a sequence inside this set (squares). The analytical approximation is given by  $p_B$  (File S2). **C)** the vertical axis shows the fraction of all sequences in sequence space that are in the 1-mutant neighborhood, i.e., only one nucleotide change away, from a biological TF binding site (circles) or from a random sequence in the set  $r_B$ . Note that even for  $p_B = 0.05$  almost one half of all sequences are in the neighborhood of biological TF binding sites, and this proportion is even higher for random sequences. The analysis is based on three and ten replicate exhaustive analyses of all sequences in sequence space for biological and random sequences, respectively, and on one random nucleotide mutation per sequence in each replicate. Error bars correspond to one standard error of the mean over the replicates.
